# Supplementary material for: CCSO nano catalyzed solid phase synthesis of 3-oxo-5,6-disubstituted-2,3-dihydropyridazine-4-carbonitrile
Source: Royal Society of Chemistry journal article supplement (doi:10.1039/c4ra06640e), 2014-01-01

**CCSO nano catalyzed solid phase synthesis of 3-oxo-5,6-disubstituted-2,3-dihydropyridazine-4-carbonitrile**

**Praveen Singh, Ranjeet Kumar, Brijesh Kumar Yadav, Ranjana S. Khanna, Ashish Kumar Tewari\***

*Department of Chemistry, Faculty of Science, Banaras Hindu University, Varanasi-221005*

\*Email ID: [tashish2002@yahoo.com](mailto:tashish2002@yahoo.com)

- Spectral data of compound 2a-2i.
- <sup>1</sup>H NMR spectra of compound (2a-2i) from page no. 5 to 11.
- <sup>13</sup>C NMR spectra of compound (2a-2h) from page no. 12 and 18.

**2-cyanoacetohydrazide (1):**

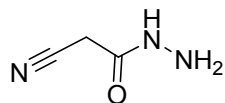

M.P.104-105°C; Yield: 0.17g (86%); FAB MS: m/z 100 (M+1); Elemental analysis for C<sub>3</sub>H<sub>5</sub>N<sub>3</sub>O: Calcd: C, 36.36; H, 5.09; N, 42.41%; Found: C, 36.31; H, 5.06; N, 42.39%.

**3-oxo-5,6-diphenyl-2,3-dihydropyridazine-4-carbonitrile (2a):** M.P.270-272°C; Yield: 5.14g

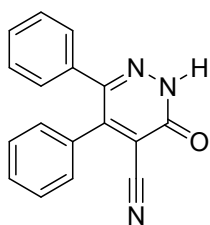

(94%); <sup>1</sup>H NMR (300MHz, CDCl<sub>3</sub>): δ 7.08-7.45 (m, 10H, Ar-H), 11.62 (s, 1H, -NH); <sup>13</sup>C NMR (75MHz, CDCl<sub>3</sub>): δ 113.4, 113.9, 127.9, 128.4, 128.5, 128.7, 129.1, 129.9, 133.3, 134.7, 145.9, 151.8, 157.5; FAB MS: m/z 274 (M+1); Elemental analysis for C<sub>17</sub>H<sub>11</sub>N<sub>3</sub>O: Calcd: C, 74.71; H, 4.06; N, 15.38%; Found: C, 74.59; H, 4.01; N, 15.27%.

**5,6-dimethyl-3-oxo-2,3-dihydropyridazine-4-carbonitrile (2b)** M.P. 209–211°C; Yield: 3.07g

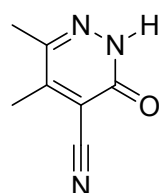

(94 %); <sup>1</sup>H NMR (300MHz, Si(CH<sub>3</sub>)<sub>4</sub>, CDCl<sub>3</sub>): δ 2.34 (s, 3H, CH<sub>3</sub>), 2.49 (s, 3H, CH<sub>3</sub>), 11.28 (s, 1H, NH); FAB MS: m/z 150 (M+1); Elemental analysis for C<sub>7</sub>H<sub>7</sub>N<sub>3</sub>O: Calcd: C, 56.37; H, 4.73; N, 28.17%; Found: C, 56.21; H, 4.68; N,

28.32%.

**5,6-bis(2-chlorophenyl)-3-oxo-2,3-dihydropyridazine-4-carbonitrile (2c):** M.P.263-265°C;

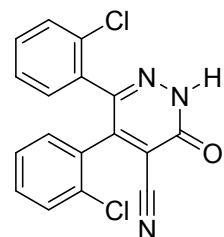

Yield: 6.5g (95%);<sup>1</sup>H NMR (300MHz, CDCl<sub>3</sub>): δ 7.04-7.41 (m, 6H, Ar-H), 7.61-7.87 (d, 1H, Ar-H), 7.90-7.96 (d, 1H, Ar-H); <sup>13</sup>C NMR (75MHz, CDCl<sub>3</sub>): δ 104.1, 112.3, 126.4, 126.8, 127.6, 128.1, 128.3, 129.5, 129.7, 134.0, 134.1, 137.5, 161.5, 164.6; FAB MS: m/z 342 (M+1); Elemental analysis for C<sub>17</sub>H<sub>9</sub>Cl<sub>2</sub>N<sub>3</sub>O: Calcd: C, 59.67; H, 2.65; N, 12.28%; Found: C, 59.60; H, 2.57; N, 12.24%.

**5,6-bis(4-chlorophenyl)-3-oxo-2,3-dihydropyridazine-4-carbonitrile (2d):** M.P. 268-270°C;

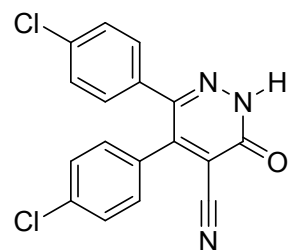

Yield: 6.36g (93%); <sup>1</sup>H NMR (300MHz, CDCl<sub>3</sub>): δ 7.30-7.45 (m, 6H, Ar-H), 7.87-7.89 (d, 2H, Ar-H), 14.42 (s, 1H, -NH); <sup>13</sup>C NMR (75MHz, CDCl<sub>3</sub>): δ 126.2, 130.5, 130.6, 131.2, 133.1, 167.2; FAB MS: m/z 342 (M+1); Elemental analysis for C<sub>17</sub>H<sub>9</sub>Cl<sub>2</sub>N<sub>3</sub>O: Calcd: C, 59.67; H, 2.65; N, 12.28%; Found: C, 59.61; H, 2.59; N, 12.20%.

**3-oxo-5,6-di-p-tolyl-2,3-dihydropyridazine-4-carbonitrile (2e):** M.P.287-289°C; Yield: 5.54g

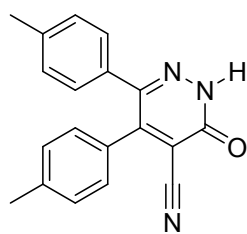

(92%); <sup>1</sup>H NMR (300MHz, CDCl<sub>3</sub>): δ 3.88 (s, 6H, 2 × CH<sub>3</sub>), 7.12-7.36 (m, 6H, Ar-H), 7.51-7.65 (d, 1H, Ar-H), 7.73-7.98 (d, 1H, Ar-H), 12.37 (s, 1H, -NH); <sup>13</sup>C NMR (75MHz, CDCl<sub>3</sub>): δ 20.3, 127.1, 127.3, 127.9, 128.1, 128.5, 128.8, 129.3, 130.1, 132.2, 132.8, 136.9, 142.9, 165.6, 167.5; FAB MS: m/z 302 (M+1); Elemental analysis for C<sub>19</sub>H<sub>15</sub>N<sub>3</sub>O: Calcd: C, 75.73;

H, 5.02; N, 13.94%; Found: C, 75.68; H, 4.99; N, 13.89%.

**5,6-bis(3-nitrophenyl)-3-oxo-2,3-dihydropyridazine-4-carbonitrile (2f):** M.P.302-305°C;

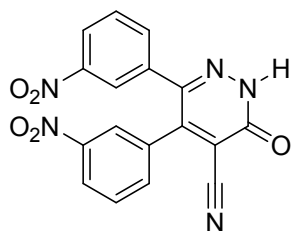

Yield: 6.54g (90%); <sup>1</sup>H NMR (300MHz, DMSO): δ 7.07-8.73 (m, 8H, Ar-H), 14.41 (s, 1H, NH); <sup>13</sup>C NMR (75MHz, DMSO): δ 123.7, 127.3, 130.5, 135.4, 147.9, 166.0; FAB MS: m/z 364 (M+1); Elemental analysis for C<sub>17</sub>H<sub>9</sub>N<sub>5</sub>O<sub>5</sub>: Calcd: C, 56.20; H, 2.50; N, 19.28%; Found: C, 56.14; H, 2.45; N, 19.23%.

**5,6-di(naphthalen-1-yl)-3-oxo-2,3-dihydropyridazine-4-carbonitrile (2g):** M.P.165-170°C;

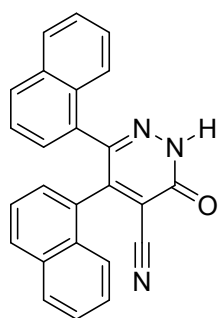

Yield: 7.09g (95%); <sup>1</sup>H NMR (300MHz, CDCl<sub>3</sub> + DMSO): δ 7.35-7.61 (m, 6H, Ar-H), 7.86-7.89 (d, 2H, Ar-H), 7.99-8.02 (d, 2H, Ar-H), 8.24-8.26 (d, 2H, Ar-H), 9.00-9.03 (d, 2H, Ar-H), 12.18 (s, 1H, NH); <sup>13</sup>C NMR (75MHz, CDCl<sub>3</sub> + few drops of DMSO): δ 124.3, 125.8, 125.9, 127.2, 127.5, 128.2, 130.2, 131.2, 132.8, 133.6, 165.0, 169.5; FAB MS: m/z 374 (M+1); Elemental analysis for C<sub>25</sub>H<sub>15</sub>N<sub>3</sub>O: Calcd: C, 80.41; H, 4.05; N, 11.25%; Found: C, 80.37; H, 4.01; N, 11.19%.

**5,6-bis(4-methoxyphenyl)-3-oxo-2,3-dihydropyridazine-4-carbonitrile (2h):** M.P. 235-236°C,

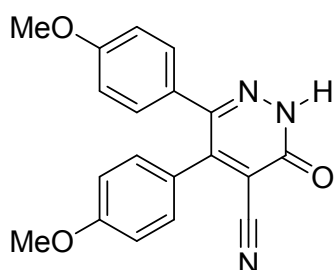

Yield: 6.45 g (93 %), <sup>1</sup>H NMR(300MHz, Si(CH<sub>3</sub>)<sub>4</sub>, CDCl<sub>3</sub>): δ 4.04 (s, 3H, OCH<sub>3</sub>), 7.19-8.47 (m, 8H, Ar-H), 14.19(s, 1H, -NH); <sup>13</sup>C NMR (75MHz, CDCl<sub>3</sub>): δ 112.4, 125.9, 134.4, 164.9; FAB MS: m/z 334 (M+1); Elemental analysis for C<sub>19</sub>H<sub>15</sub>N<sub>3</sub>O<sub>3</sub>: Calcd: C, 68.46; H, 4.54; N, 12.61%; Found: C, 68.42; H, 4.56; N, 12.59%.

**5,6-bis(4-nitrophenyl)-3-oxo-2,3-dihydropyridazine-4-carbonitrile (2i):** M.P. 302-305°C;

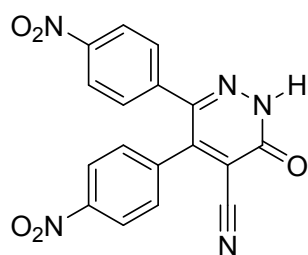

Yield: 6.93g (92 %);  $^1\text{H NMR}$  (300MHz,  $\text{Si}(\text{CH}_3)_4$ ,  $\text{CDCl}_3$ ):  $\delta$  7.65-8.70

(m, 8H, Ar-H);  $^{13}\text{CNMR}$  (75MHz,  $\text{CDCl}_3$ ):  $\delta$  122.75, 125.39, 126.39,

129.51, 130.08, 130.48, 131.60, 132.13, 132.94, 143.74, 147.71,

166.12, 166.77; FAB MS:  $m/z$  364 (M+1); Elemental analysis for

$\text{C}_{17}\text{H}_9\text{N}_5\text{O}_5$ : Calcd: C, 56.20; H, 2.50; N, 19.28%; Found: C, 56.14; H, 2.45; N, 19.23%.

<sup>1</sup>H NMR of 3-oxo-5,6-diphenyl-2,3-dihydropyridazine-4-carbonitrile (2a):

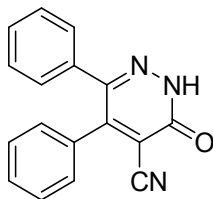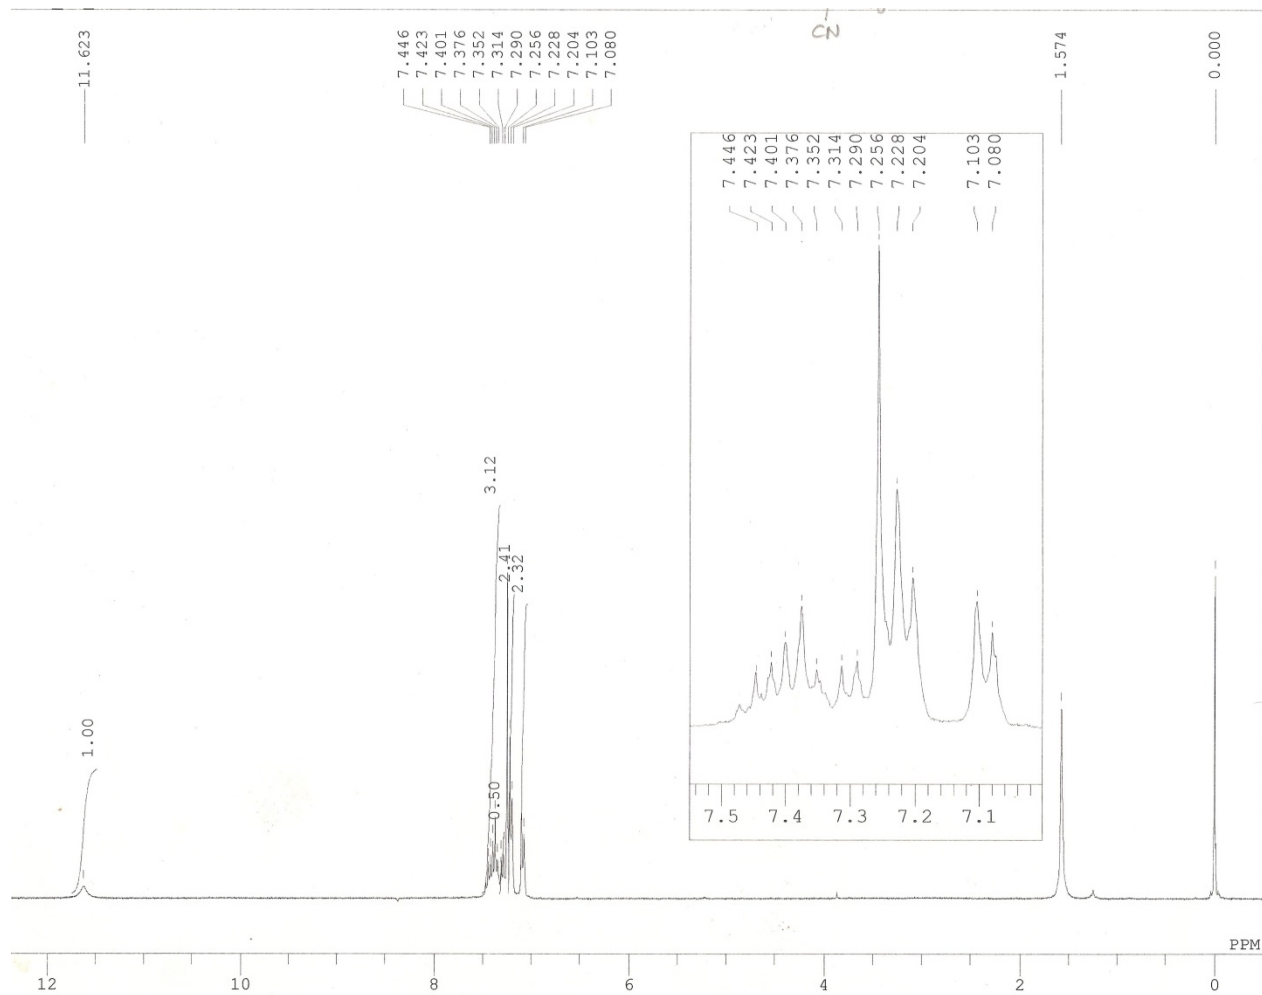

<sup>1</sup>H NMR of 5,6-bis(2-chlorophenyl)-3-oxo-2,3-dihydropyridazine-4-carbonitrile (2c):

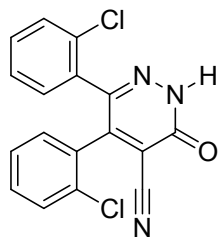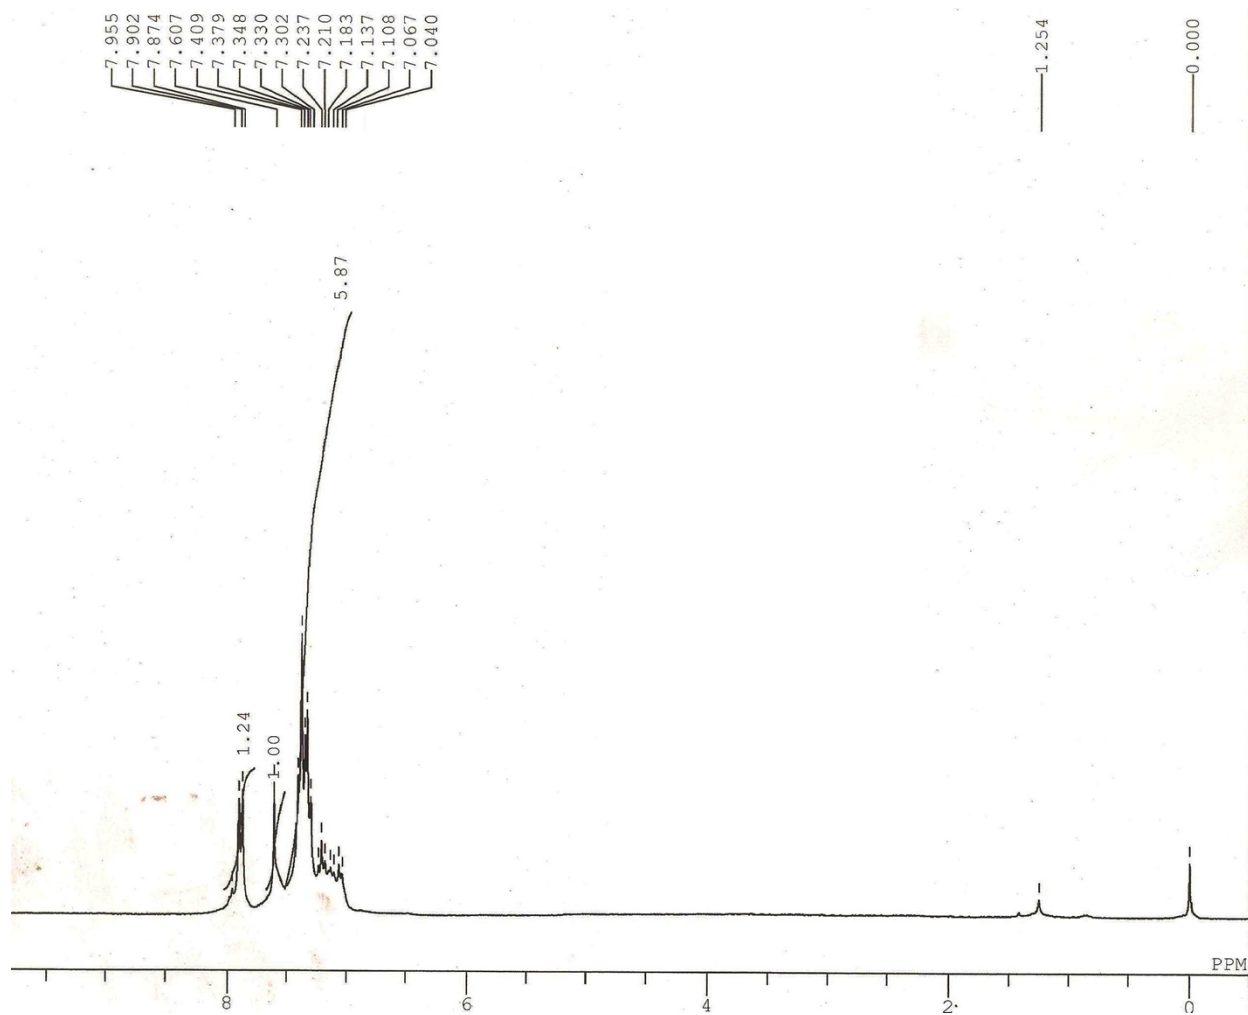

$^1\text{H}$  NMR of 5,6-bis(4-chlorophenyl)-3-oxo-2,3-dihydropyridazine-4-carbonitrile (2d):

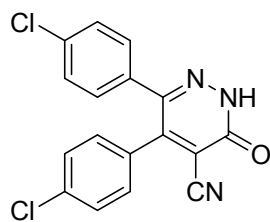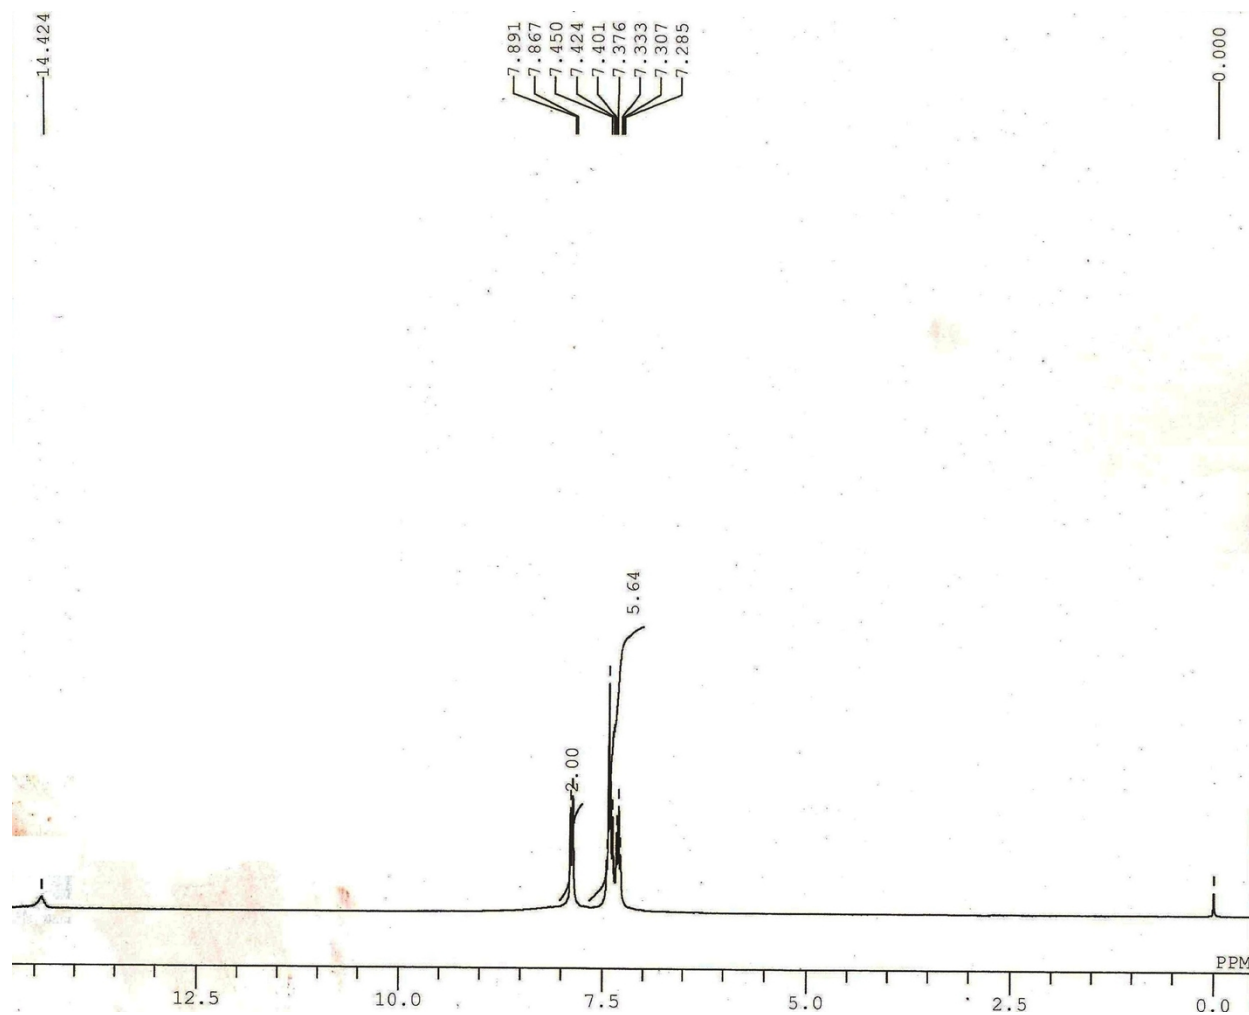

<sup>1</sup>H NMR of 3-oxo-5,6-di-p-tolyl-2,3-dihydropyridazine-4-carbonitrile (2e):

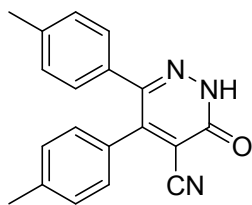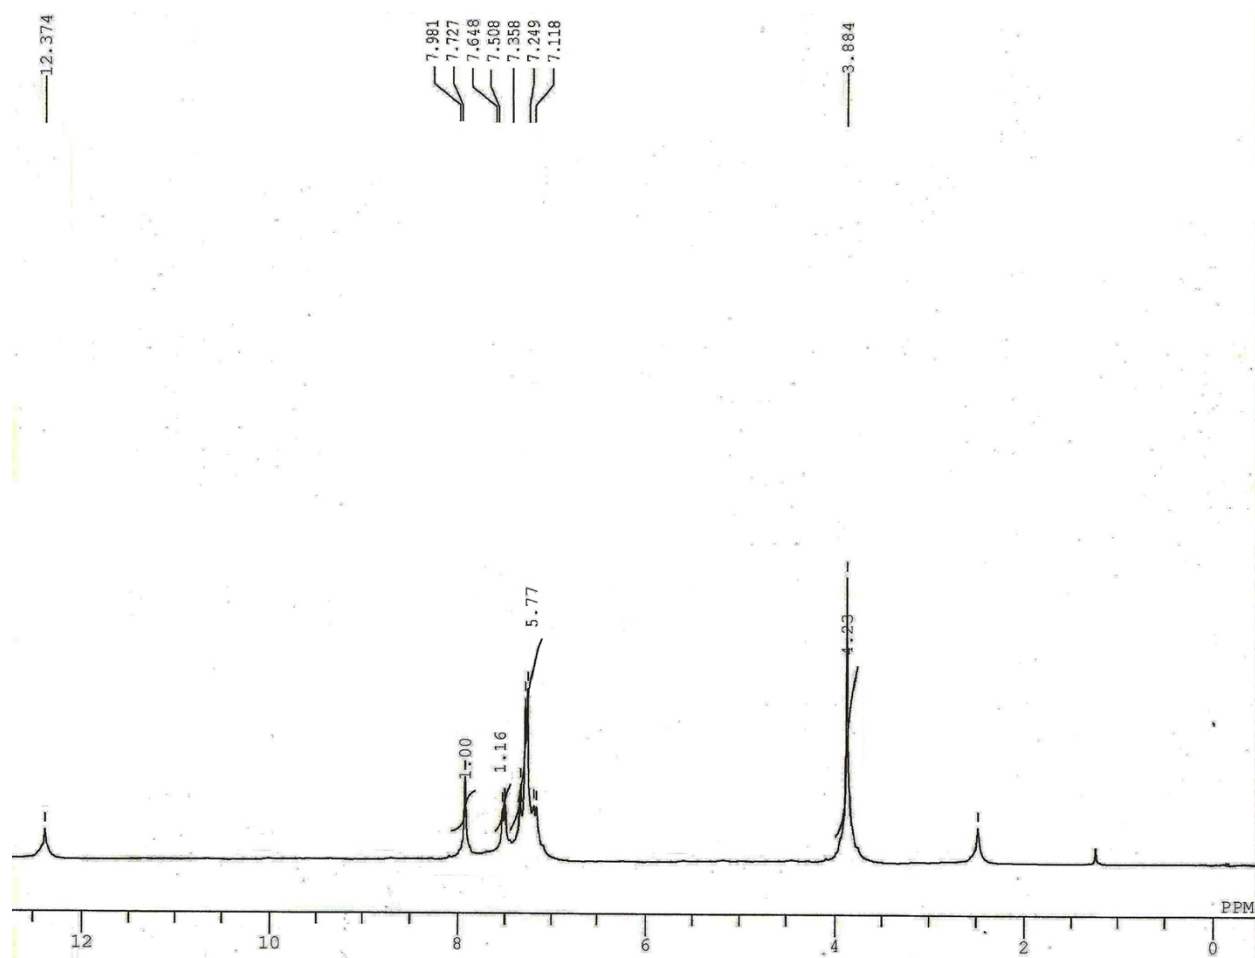



<sup>1</sup>H NMR of 5,6-bis(3-nitrophenyl)-3-oxo-2,3-dihydropyridazine-4-carbonitrile (2f)

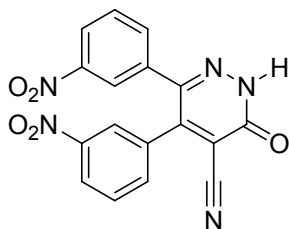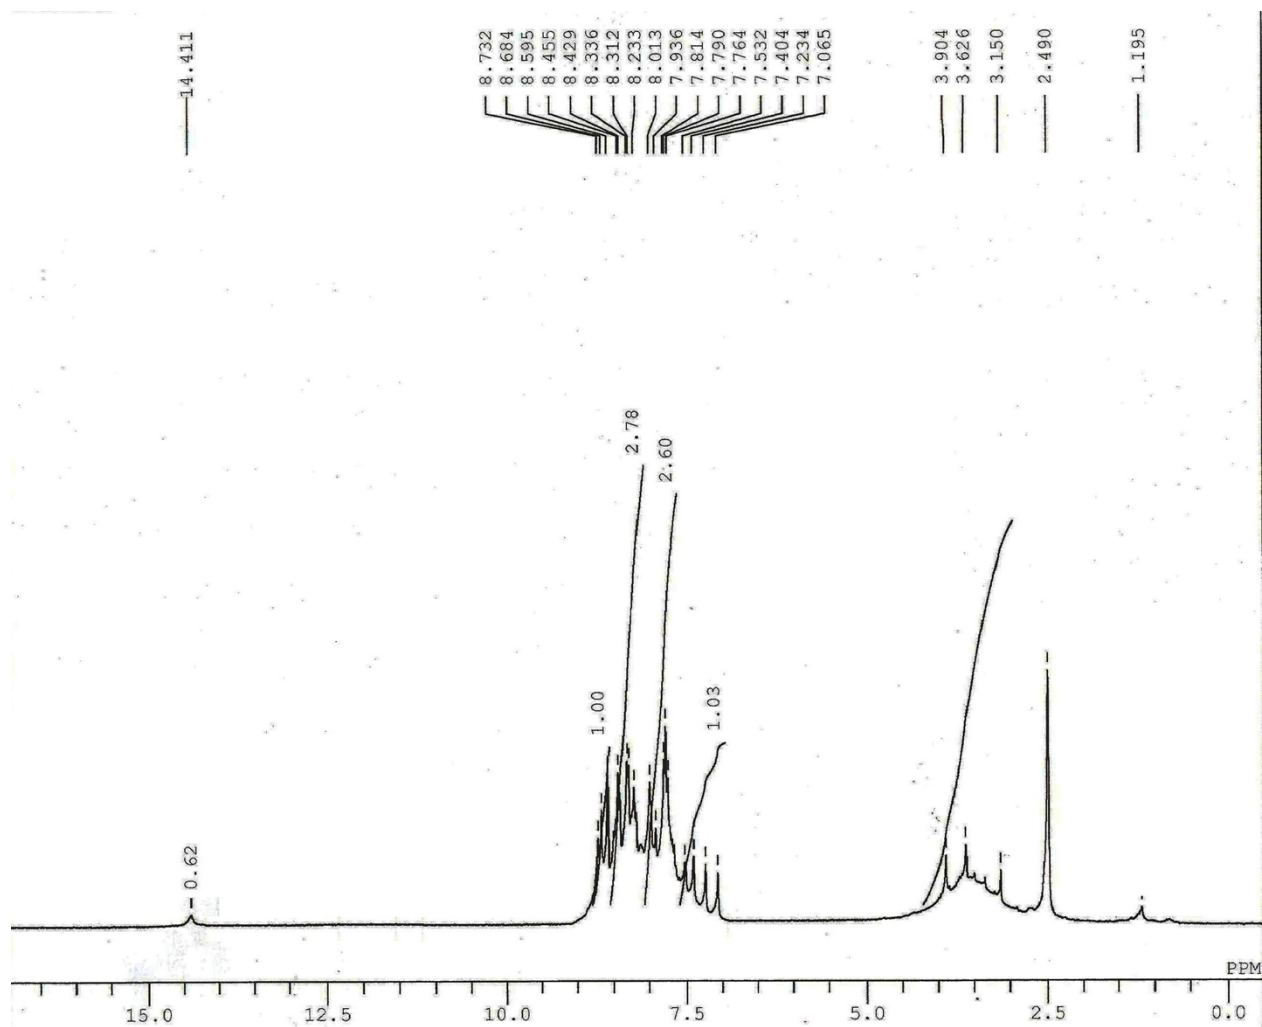

<sup>1</sup>H NMR of 5,6-di(naphthalen-1-yl)-3-oxo-2,3-dihydropyridazine-4-carbonitrile (2g):

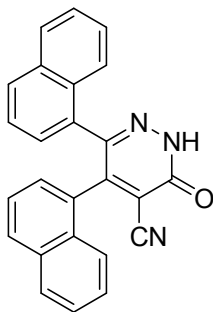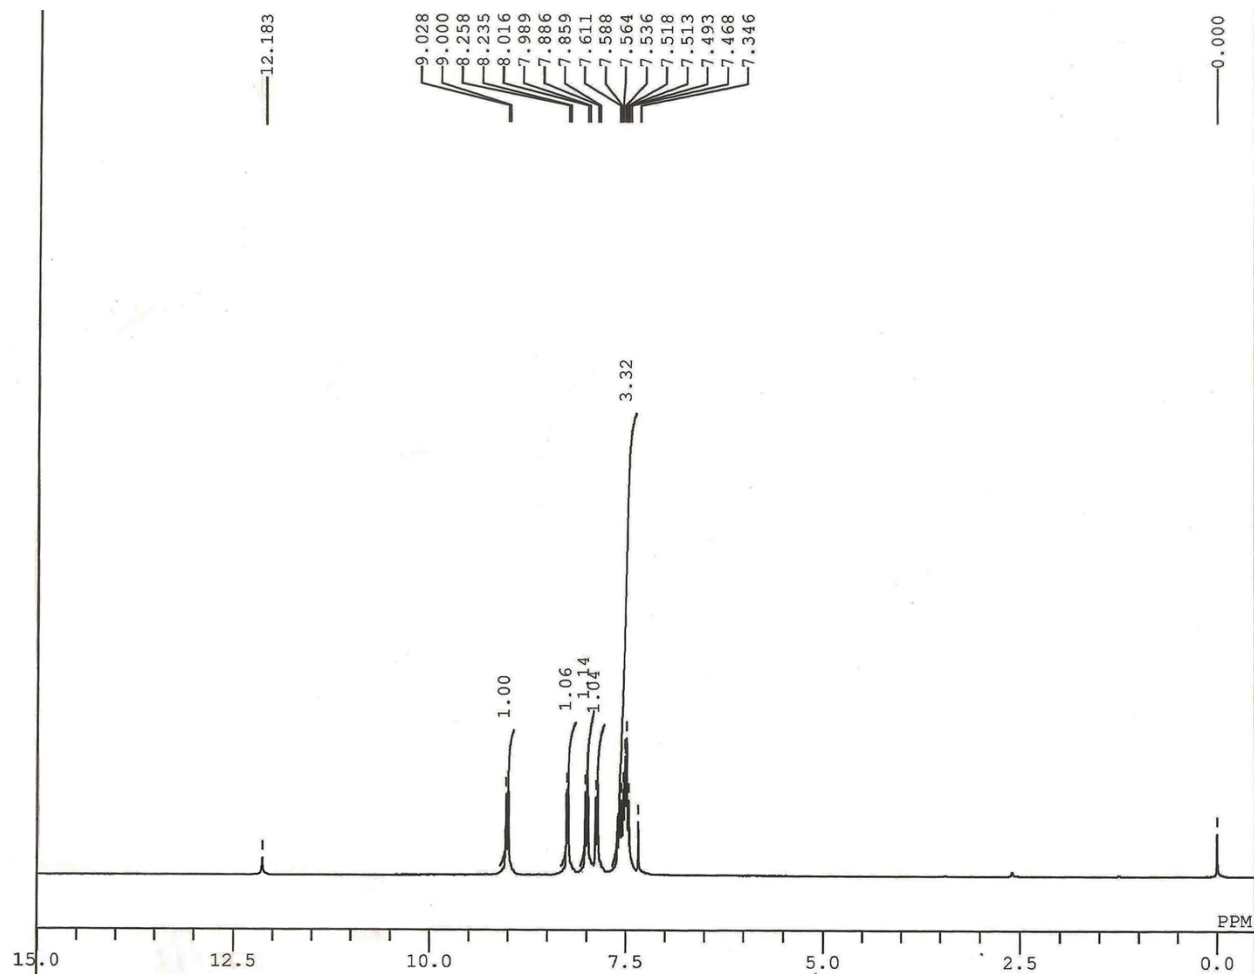

$^1\text{H}$  NMR of 5,6-bis(4-methoxyphenyl)-3-oxo-2,3-dihydropyridazine-4-carbonitrile (2h):

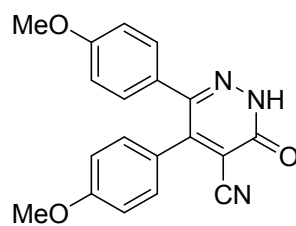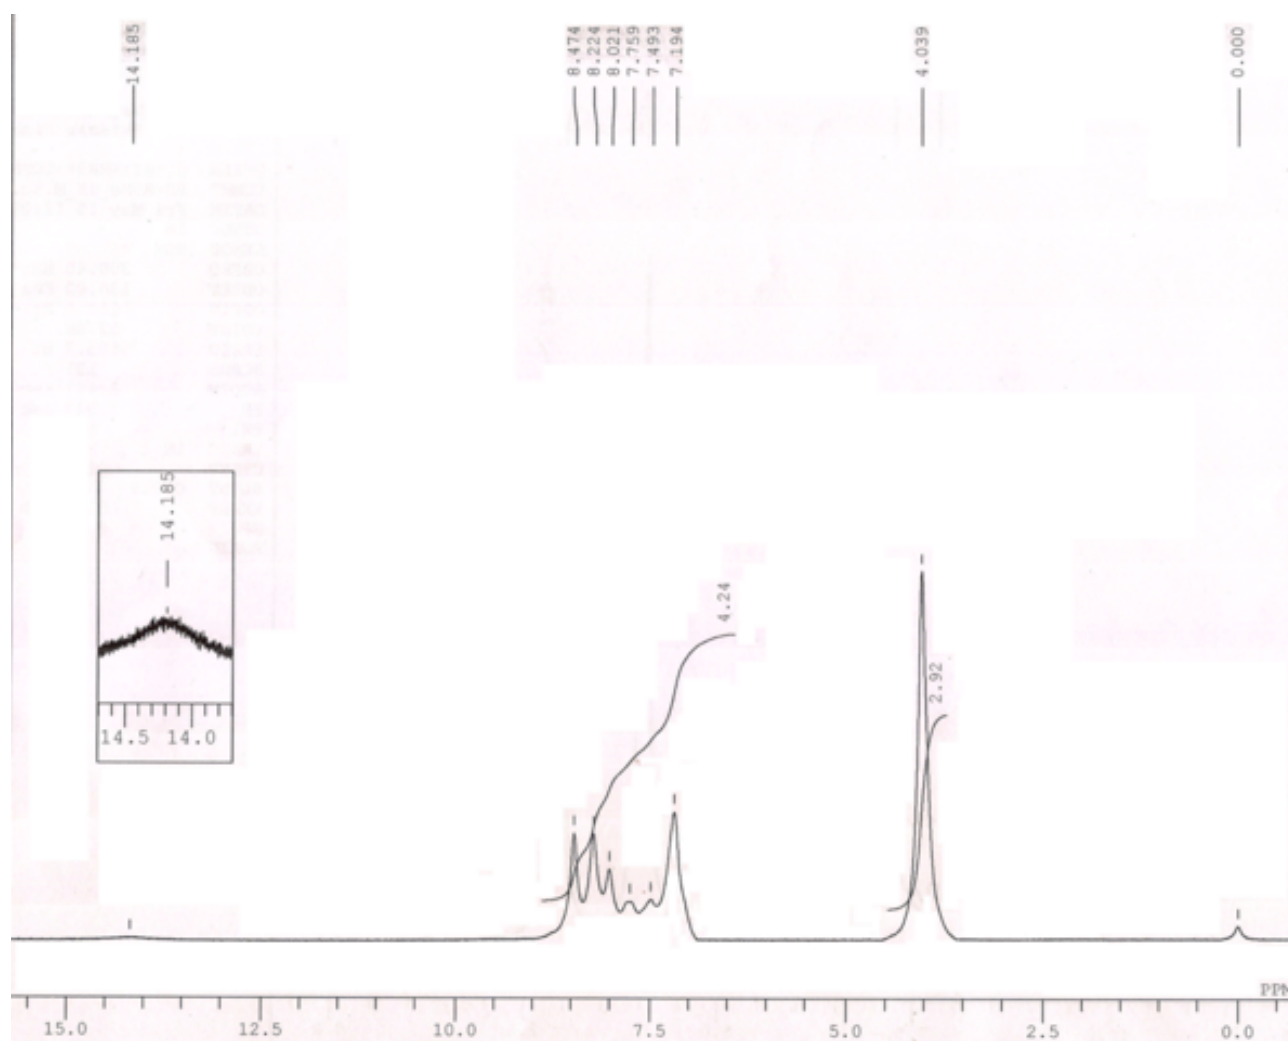

$^{13}\text{C}$  NMR of 3-oxo-5,6-diphenyl-2,3-dihydropyridazine-4-carbonitrile (2a):

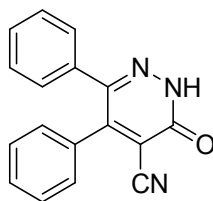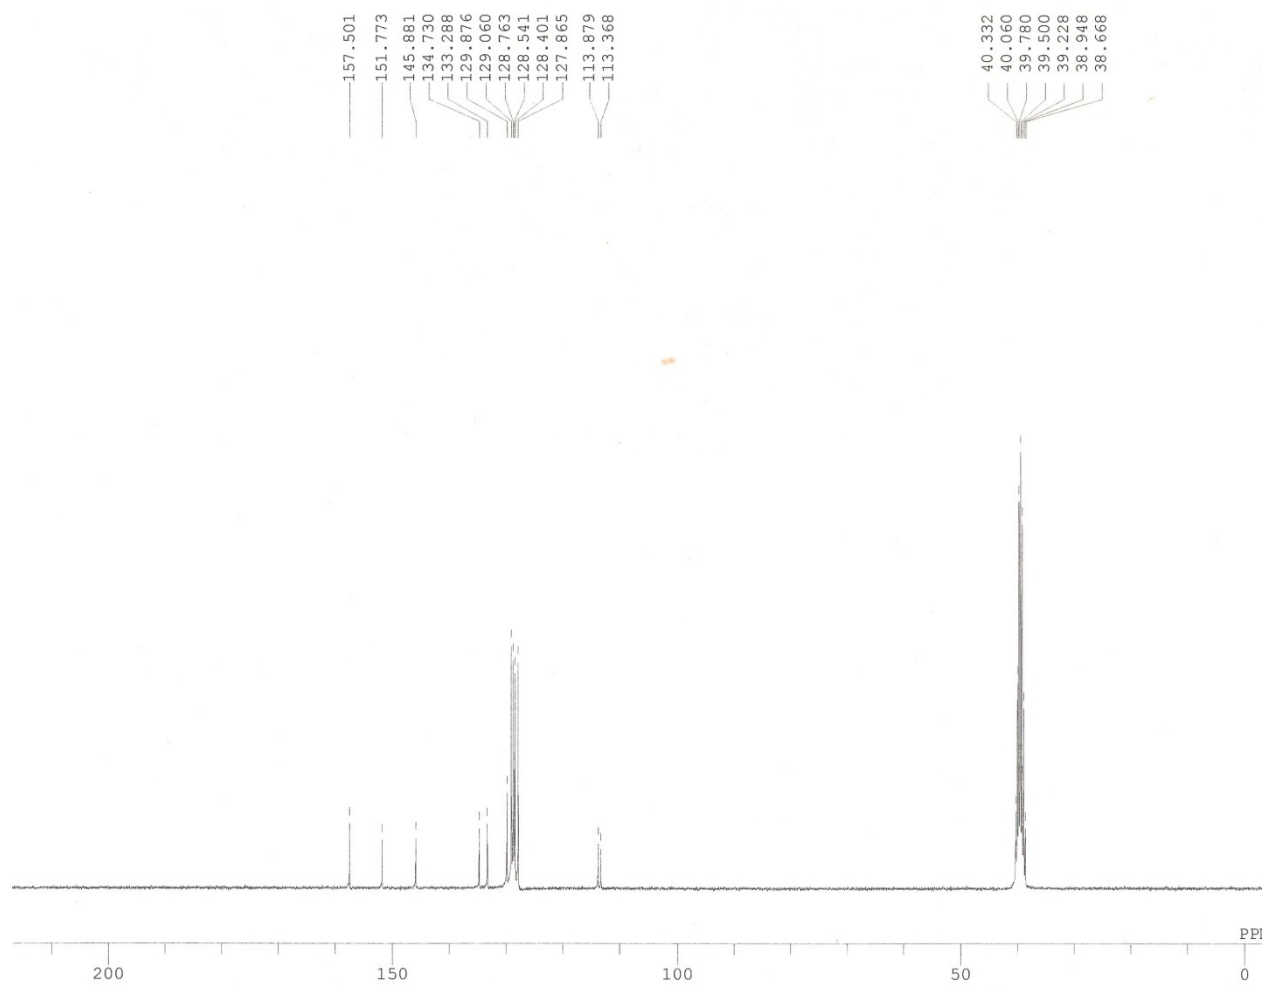

$^{13}\text{C}$  NMR of 5,6-bis(2-chlorophenyl)-3-oxo-2,3-dihydropyridazine-4-carbonitrile (2c):

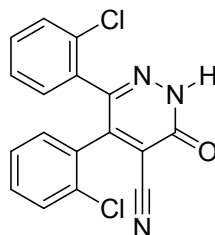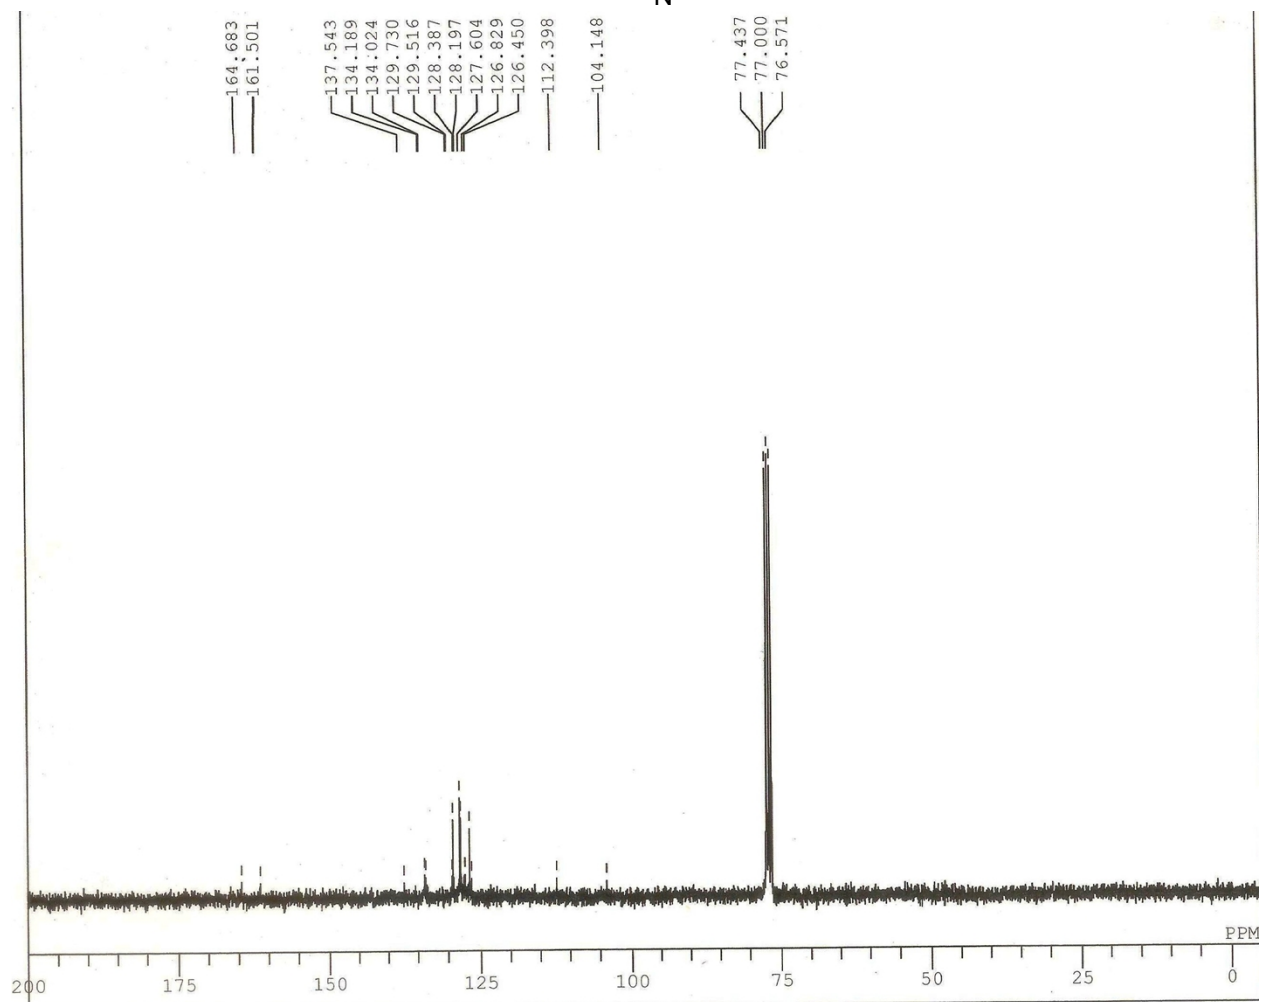

$^{13}\text{C}$  NMR of 5,6-bis(4-chlorophenyl)-3-oxo-2,3-dihydropyridazine-4-carbonitrile (2d):

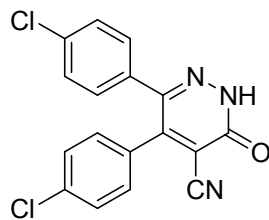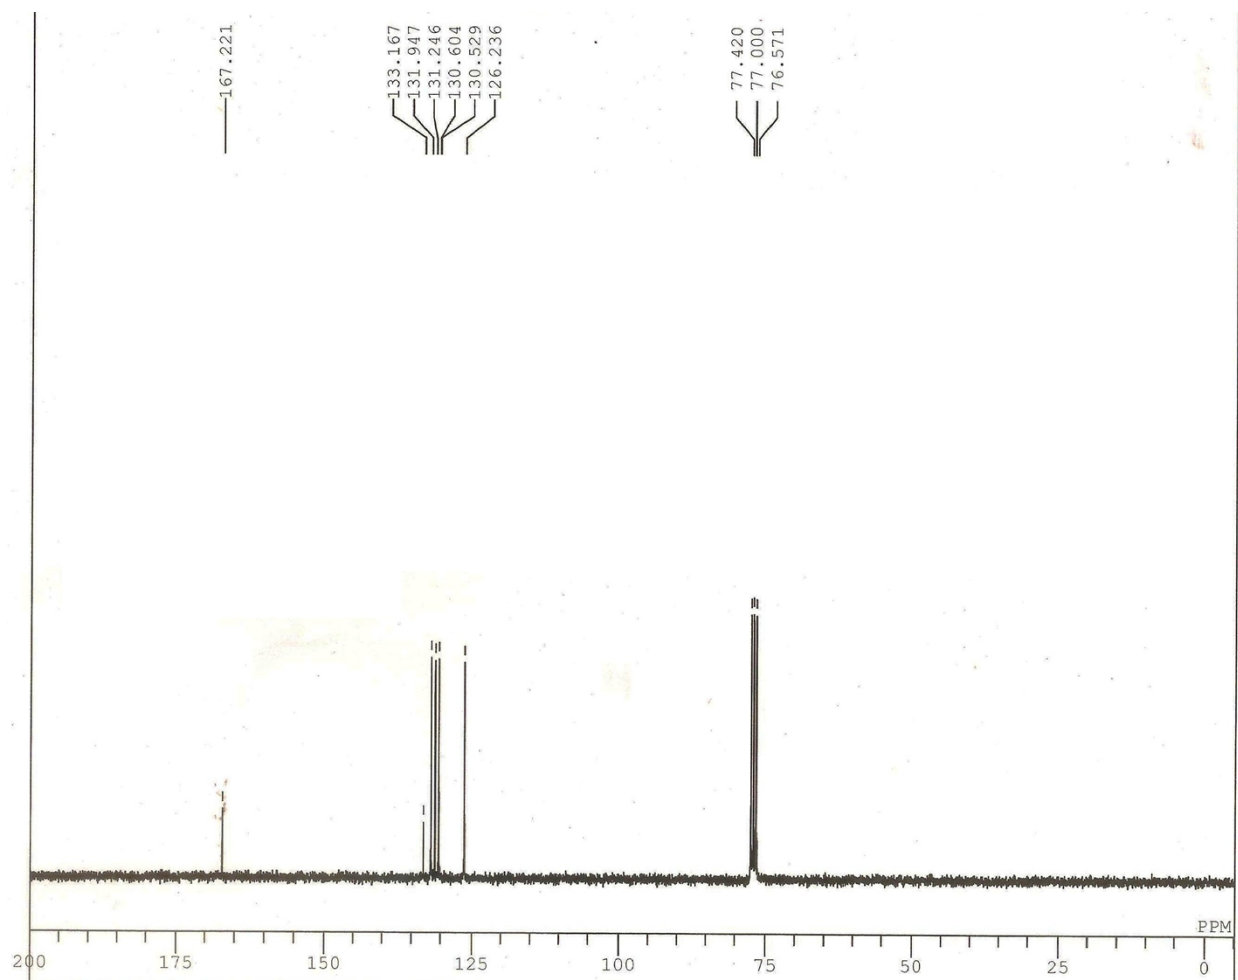

$^{13}\text{C}$  NMR of 3-oxo-5,6-di-p-tolyl-2,3-dihydropyridazine-4-carbonitrile (2e):

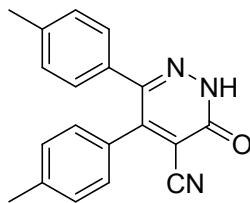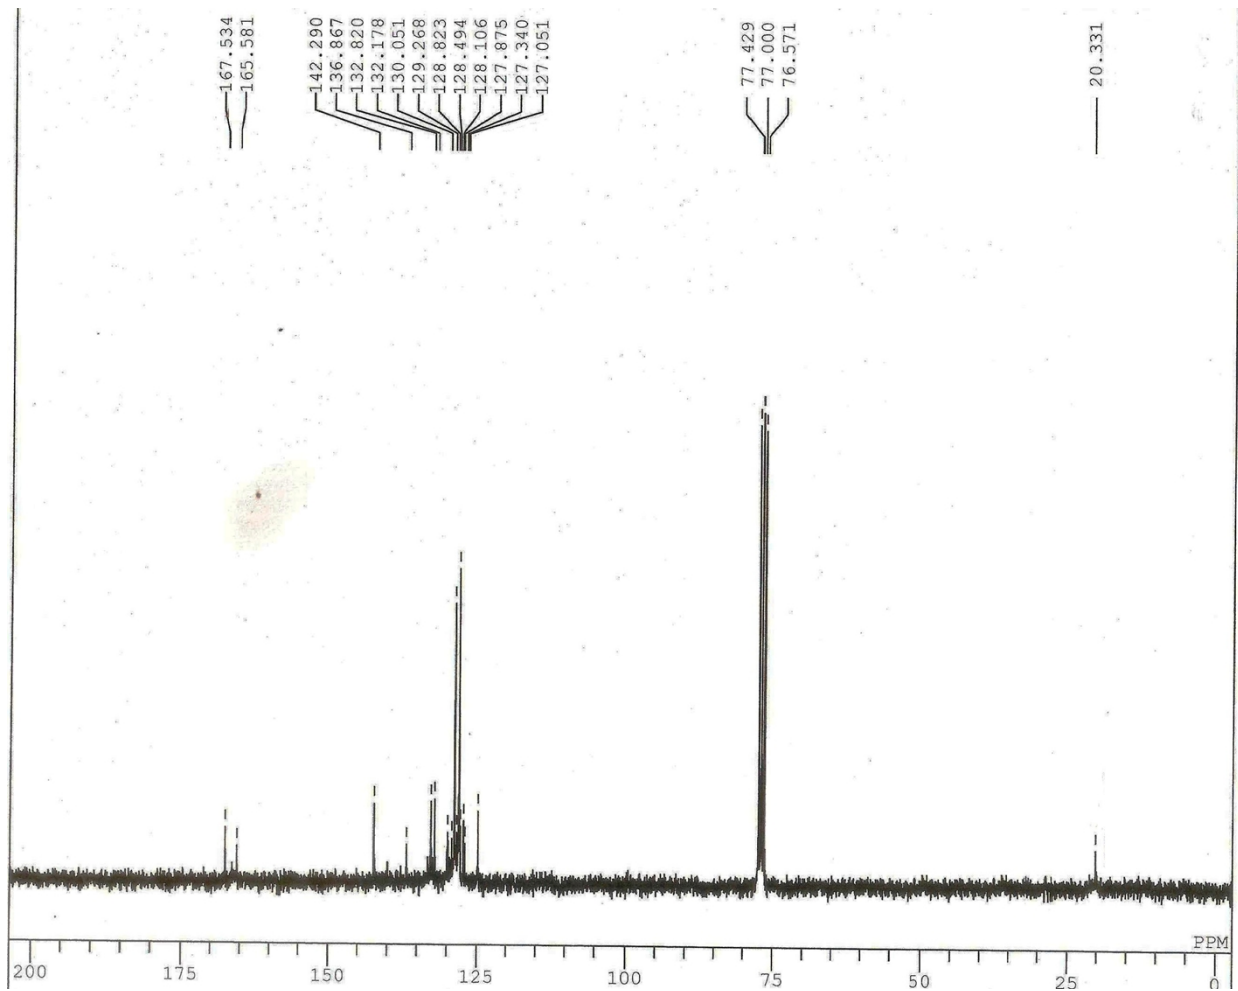

$^{13}\text{C}$  NMR of 5,6-bis(3-nitrophenyl)-3-oxo-2,3-dihydropyridazine-4-carbonitrile (2f)

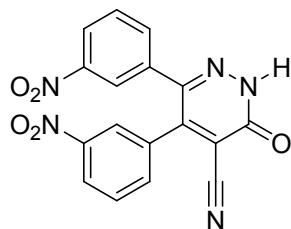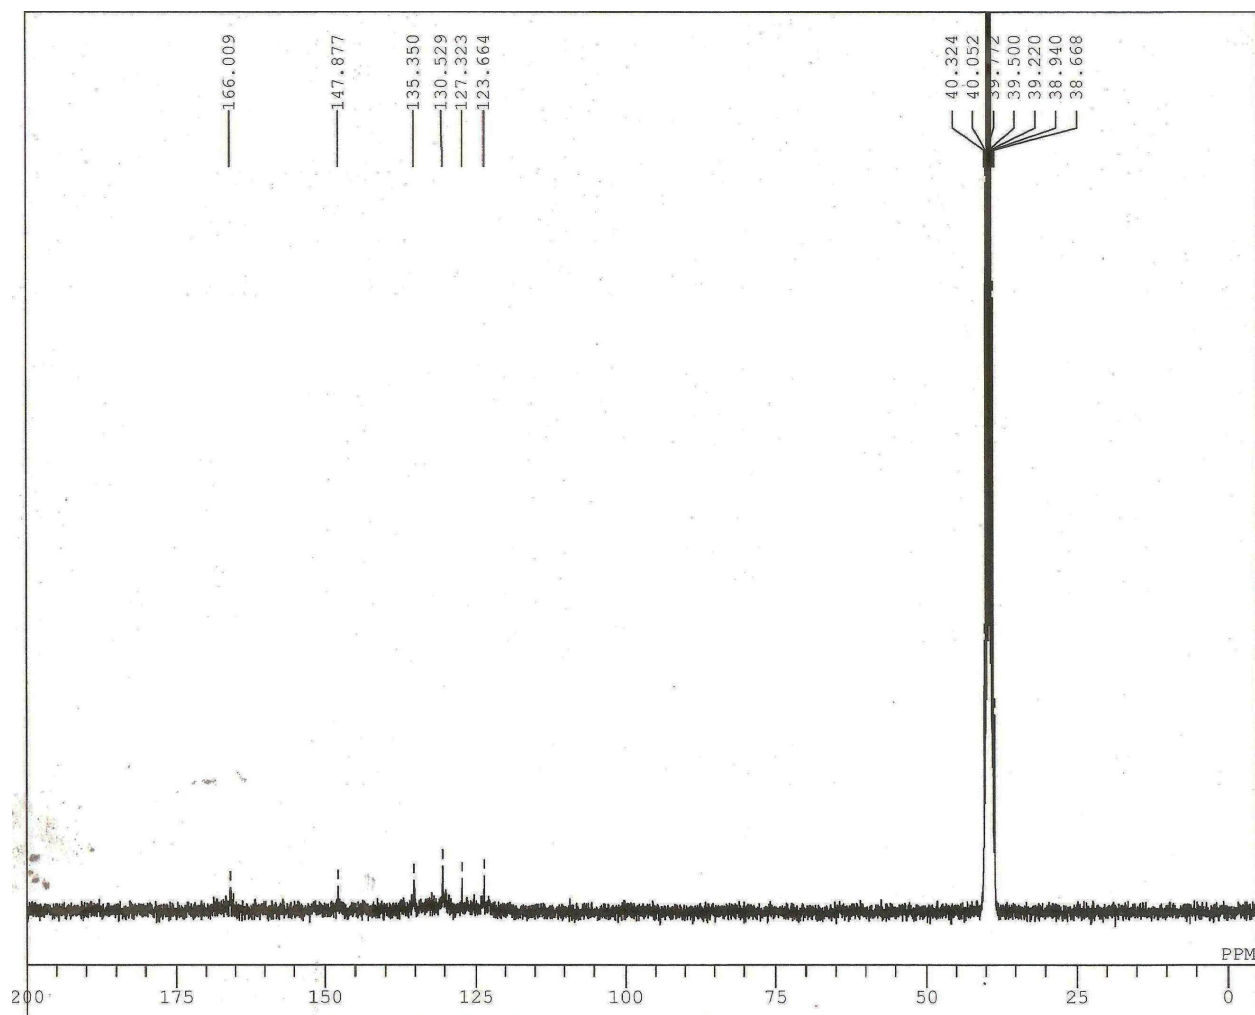



$^{13}\text{C}$  NMR of 5,6-di(naphthalen-1-yl)-3-oxo-2,3-dihydropyridazine-4-carbonitrile (2g):

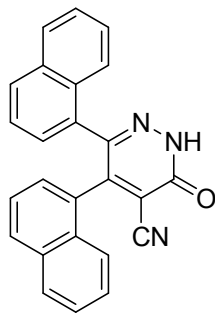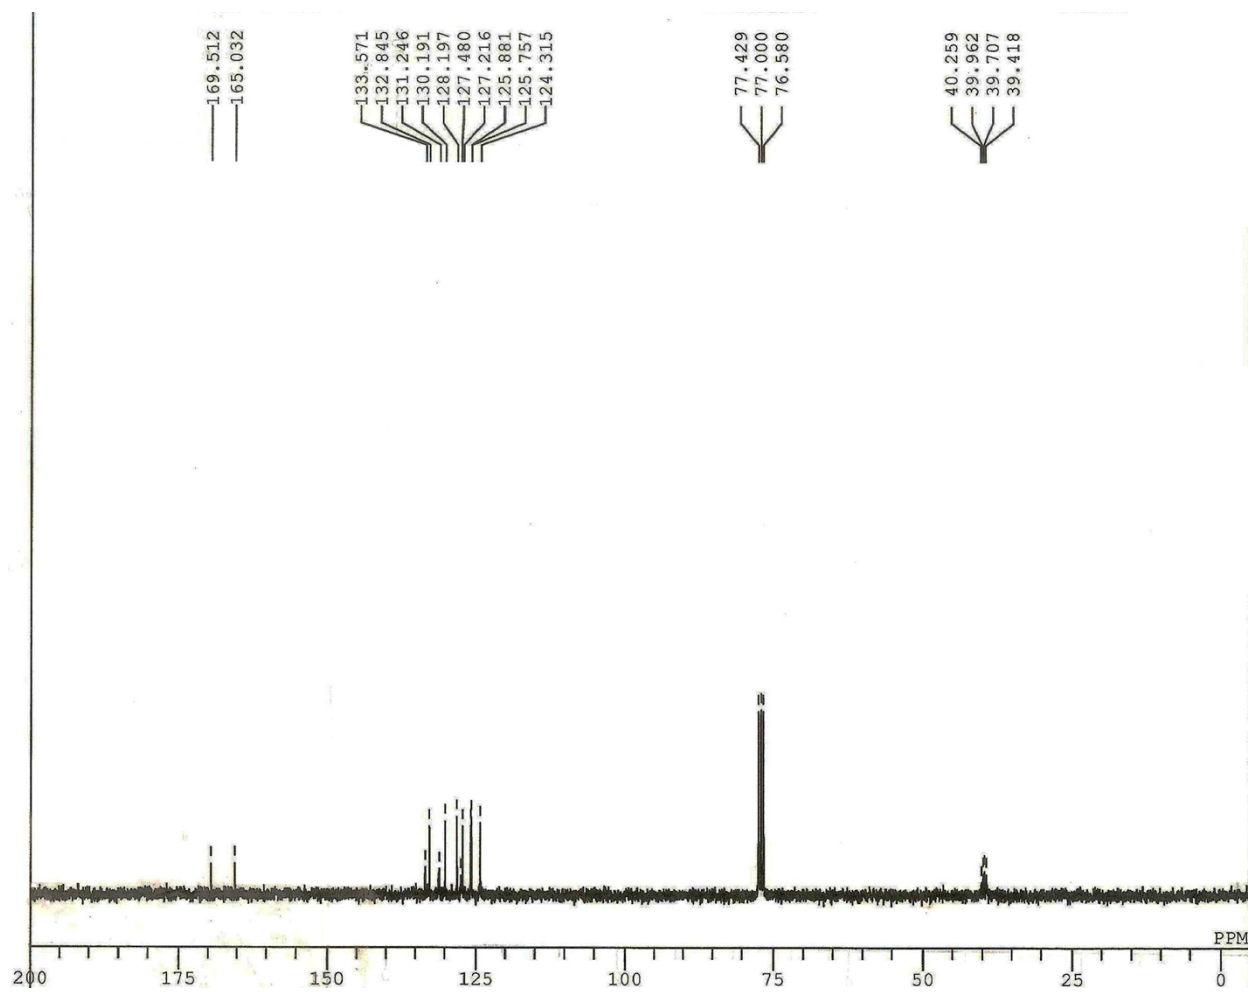

$^{13}\text{C}$  NMR of 5,6-bis(4-methoxyphenyl)-3-oxo-2,3-dihydropyridazine-4-carbonitrile (2h)

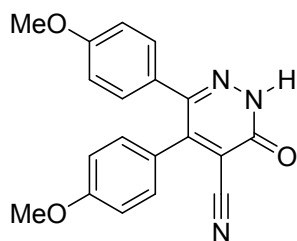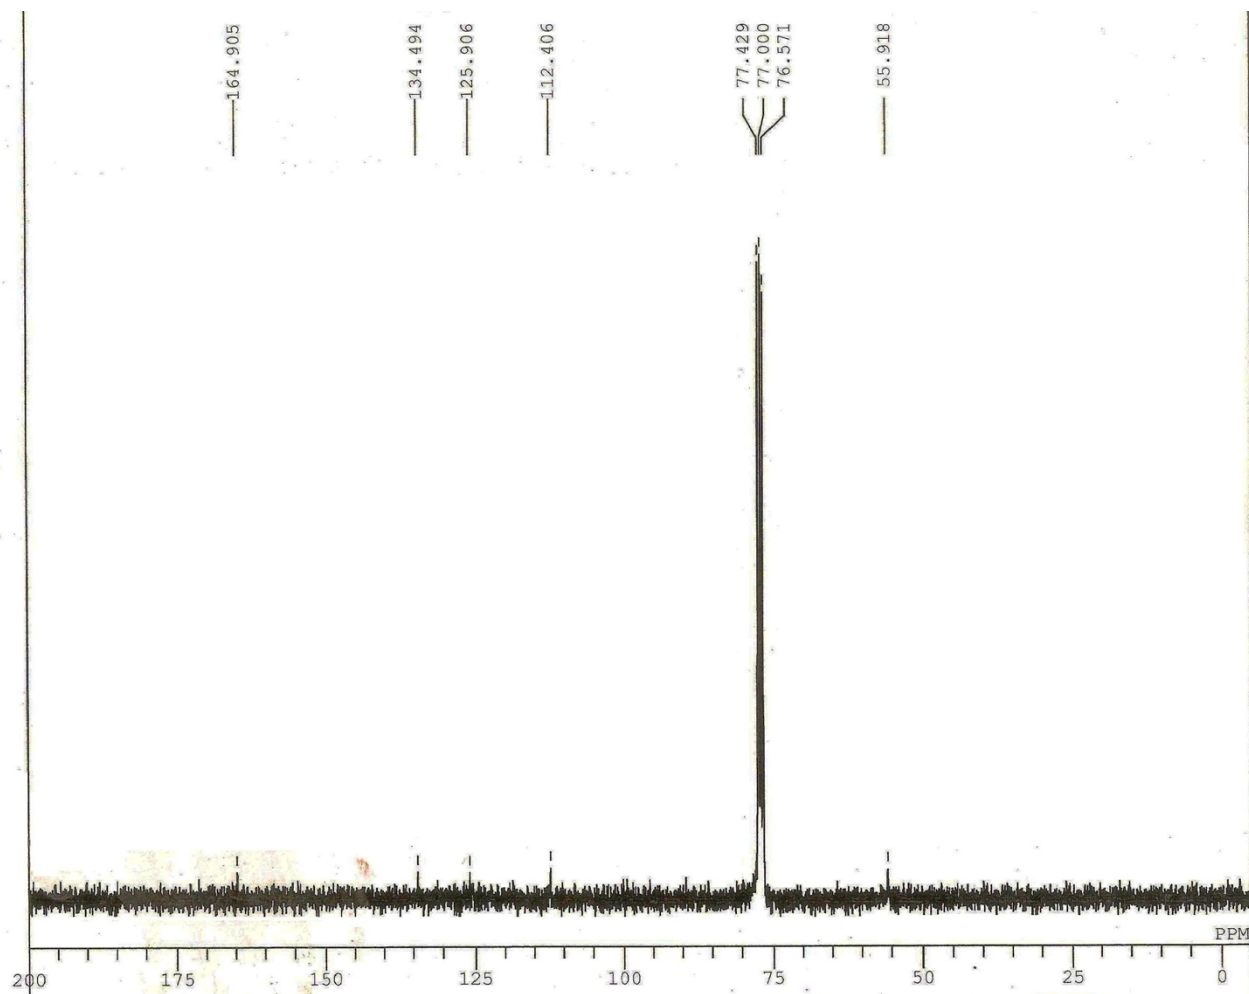

Supplement: c4ra06640e1.pdf [file c4ra06640e1.pdf]
